# Supplementary material for: Management practice and treatment outcomes of adult patients with Lupus Nephritis at the Renal Clinic of St. Paul’s Hospital Millennium Medical College, Addis Ababa, Ethiopia
Source: Springer Nature journal article supplement (doi:10.1186/s12882-022-02846-z), 2022-06-17
Supplement: MOESM1 [file 23177280]

## Annex

### Data abstraction format

#### **Part I: Socio-demographic characteristics**

Patient MRN: \_\_\_\_\_

1. Sex                     Male     Female
2. If female,     Pregnant     Non-pregnant     Breast feeding
3. Age at LN diagnosis (year): \_\_\_\_\_
4. Place of residence     Rural     Urban
5. Smoking status         Smoker     Non-smoker     Not documented

#### **Part II: Baseline patient clinical presentation**

1. Initial confirmation/date of diagnosis of LN (SLE with renal involvement) \_\_\_\_\_ date/month/year
2. Clinical presentation
  - High blood pressure
  - Periorbital puffiness
  - Edema, Specify: \_\_\_\_\_
  - Other non-specific symptoms: \_\_\_\_\_
3. Weight (kg) at diagnosis: \_\_\_\_\_
4. Blood pressure (BP) at baseline: \_\_\_\_\_ mmHg, and at end of the study: \_\_\_\_\_ mmHg
5. Lupus class at first biopsy:    I     II     III     IV     V     VI
6. Repeated biopsy class: \_\_\_\_\_

**Part III: Medical history and LN complications**

1. Presence of medical history      Yes                       No

2. Presence of LN complications      Yes                       No

If the response for the above question is yes, which of the following medical history or LN complications? (Can tick more than once)

| <b>Comorbid conditions and LN complication</b>                                        | Yes | No |
|---------------------------------------------------------------------------------------|-----|----|
| <b>Any intrinsic renal disease</b>                                                    |     |    |
| AKI (acute tubular necrosis, interstitial nephritis)                                  |     |    |
| Nephrotic syndrome                                                                    |     |    |
| Others(specify):                                                                      |     |    |
| <b>Any non-renal comorbidities</b>                                                    |     |    |
| Antiphospholipid syndrome (APS)                                                       |     |    |
| Lupus cerebritis                                                                      |     |    |
| Discoid lupus erythematosus                                                           |     |    |
| Drug induced lupus                                                                    |     |    |
| Infection-related glomerulonephritis                                                  |     |    |
| Others(specify):                                                                      |     |    |
| <b>Complications</b>                                                                  |     |    |
| CKD/ESRD                                                                              |     |    |
| Others (thrombotic microangiopathy (TMA), cardiovascular complications, malignancies) |     |    |

**Part IV: Baseline and end of study pertinent laboratory investigations**

1. Complete blood count (CBC)

| Parameters   | WBC | RBC | HGB | HCT | PLT | ESR |
|--------------|-----|-----|-----|-----|-----|-----|
| Baseline     |     |     |     |     |     |     |
| End of study |     |     |     |     |     |     |

2. Renal function tests (RFT)

| Parameters            | Serum creatinine (SCr) | Urea (BUN) | Estimated glomerular filtration (eGFR) |
|-----------------------|------------------------|------------|----------------------------------------|
| Baseline              |                        |            |                                        |
| 6 <sup>th</sup> month |                        |            |                                        |
| End of study          |                        |            |                                        |

3. Urine analysis

| Parameters            | 24-hr Urine Protein |          | Urine Protein | Urine WBC | Urine RBC | Urine bacteria | Urinary casts | Serum albumin | UPCR |
|-----------------------|---------------------|----------|---------------|-----------|-----------|----------------|---------------|---------------|------|
|                       | Non pregnant        | Pregnant |               |           |           |                |               |               |      |
| Baseline              |                     |          |               |           |           |                |               |               |      |
| 6 <sup>th</sup> month |                     |          |               |           |           |                |               |               |      |
| End of study          |                     |          |               |           |           |                |               |               |      |

4. Serum electrolytes

| Parameters   | Sodium(Na) | Potassium(K) | Chloride(CL) | Calcium total | Phosphorus(Phos) |
|--------------|------------|--------------|--------------|---------------|------------------|
| Baseline     |            |              |              |               |                  |
| End of study |            |              |              |               |                  |

5. Immunological investigations

| Parameters   | ANA | Anti-dsDNA | C3 Level | C4 Level | ANCA | RF |
|--------------|-----|------------|----------|----------|------|----|
| Baseline     |     |            |          |          |      |    |
| End of study |     |            |          |          |      |    |

6. Lupus anticoagulants (Lupus inhibitors)

| Parameters   | Lupus anticoagulants(LA) |                          |            |             |                 |
|--------------|--------------------------|--------------------------|------------|-------------|-----------------|
|              | Beta 2 Glycoprotein1-IgG | Beta 2 Glycoprotein1-IgM | LA1 screen | LA2 confirm | Ratio (LA1/LA2) |
| Baseline     |                          |                          |            |             |                 |
| End of study |                          |                          |            |             |                 |

7. Other antibodies tests

| Parameters   | Cardiolipin antibodies, IgG, IgM | Phospholipid antibody (APA), IgG, IgM | Beta 2 Glycoprotein1, IgA |
|--------------|----------------------------------|---------------------------------------|---------------------------|
| Baseline     |                                  |                                       |                           |
| End of study |                                  |                                       |                           |

8. Coagulation profiles

| Parameters   | PT | INR | PTT |
|--------------|----|-----|-----|
| Baseline     |    |     |     |
| End of study |    |     |     |

9. Lipid profiles

| Parameters   | Total cholesterol | TG | HDL | LDL |
|--------------|-------------------|----|-----|-----|
| Baseline     |                   |    |     |     |
| End of study |                   |    |     |     |

10. Liver function tests

| Parameters   | ALT | AST | ALP |
|--------------|-----|-----|-----|
| Baseline     |     |     |     |
| End of study |     |     |     |

11. Glucose levels

| Parameters   | RBS | FBS | HgA1C |
|--------------|-----|-----|-------|
| Baseline     |     |     |       |
| End of study |     |     |       |

**Part V: Hospitalization events**

1. Hospitalization events due to LN.       Yes       No
2. Reason for admission;                       Due to LN flare/relapse       Due to other comorbidities
3. Presence/development of infection       Yes       No,

3.1 If yes for no. 3 what antibiotics are given: \_\_\_\_\_

**Part VI: Medication management practice of LN complications and comorbidities (LN follow up management)**

1. List of prescribed medications

| Type of medications                              | Dose and frequency | Start date | Stop date | Yes | No |
|--------------------------------------------------|--------------------|------------|-----------|-----|----|
| <b>Induction therapy/phase</b>                   |                    |            |           |     |    |
| Prednisolone                                     |                    |            |           |     |    |
| Methylpredinsolone                               |                    |            |           |     |    |
| Cyclophosphamide                                 |                    |            |           |     |    |
| Mycophenolate mofetil (MMF)                      |                    |            |           |     |    |
| Azathioprine                                     |                    |            |           |     |    |
| Tacrolimus                                       |                    |            |           |     |    |
| Rituximab                                        |                    |            |           |     |    |
| <b>Maintenance therapy/phase</b>                 |                    |            |           |     |    |
| Prednisolone                                     |                    |            |           |     |    |
| Mycophenolate mofetil (MMF)                      |                    |            |           |     |    |
| Azathioprine                                     |                    |            |           |     |    |
| Tacrolimus                                       |                    |            |           |     |    |
| <b>Kidney protective regimens</b>                |                    |            |           |     |    |
| ACEIs                                            |                    |            |           |     |    |
| ARBs                                             |                    |            |           |     |    |
| <b>Other medications (adjunctive treatments)</b> |                    |            |           |     |    |
| Chloroquine or Hydroxychloroquine                |                    |            |           |     |    |
| Others (specify if pertinent to LN):             |                    |            |           |     |    |

2. Total duration of treatment for LN up to end of data collection in months: \_\_\_\_\_

**Part VII: If any medications are adjusted/stopped/changed during the study period,**

| Medication name | Reason(ADR, relapse/flare, pregnancy, availability/cost issue) | Description of the ADR if reported |
|-----------------|----------------------------------------------------------------|------------------------------------|
|                 |                                                                |                                    |
|                 |                                                                |                                    |
|                 |                                                                |                                    |

**Part VIII: Outcome measures/end points**

1. Complete renal remission (CR)

1.1. Decline or reduction in proteinuria to < 0.5g/g measured as UPCR from a 24-hr urine collection: Yes  No

1.2. Stabilization or improvement in kidney function ( $\pm$ 10-15% of baseline): Yes  No

2. Partial renal remission (PR)

2.1. Reduction in proteinuria by at least 50% and to <3g/g measured as UPCR from a 24-hr urine collection : Yes  No

2.2. Stabilization or improvement in kidney function ( $\pm$ 10-15% of baseline): Yes  No

3. No response/non responders (NR)

3.1. Failure to achieve a complete or partial remission: Yes  No

3.1.1. Worsening of kidney function: Yes  No

3.1.2. Re-biopsy (activity present or absent): Yes  No

4. Worse outcomes

4.1. Progression to ESRD: Yes  No

4.2. All-cause mortality: Yes  No
